# Supplementary material for: Origins and Evolution of the Etruscans’ mtDNA
Source: PLoS One. 2013 Feb 6;8(2):e55519. doi: 10.1371/journal.pone.0055519 (PMC3566088; doi:10.1371/journal.pone.0055519)
Supplement: Figure S1 — Amplicons of the 10 sequences from Casenovole. DNA sequences from the575 clones analysed for the 10 Casenovole Etruscan samples. The sequences of the external primers are not reported in the figure. The Cambridge reference sequence with the numbering of the nucleotide positions is at the top. Nucleotides identical to the Cambridge reference sequence are indicated by dots. The clones are identified by a code (from S1 to S17, indicating the individual), the first number is the extraction, the second number is the PCR. (PDF) [file pone.0055519.s001.pdf]

[illegible]

TTACAAGCAAGTACAGCAATCAACCCCTCAACTATCACACATCAACTGCAACTCCAAGGCCACCCCTCACCCTAGGATACCAACAAACCTACCCACCCCTTAACAGTACATAGTACATAAAGCCATTTACCGTACATAGCACATTACAGTCAAATCCCTTCTCGTCCCCATGGATGACCCCCCTCAG

[illegible]

.....

TGCTTACAAGCAAGTACAGCAATCAACCCCTCAACTATCACACATCAACTGCAACTCCAAAGCCACCCCTCACCCCTAGGATACCAACAAACCTACCCACCTTAAACAGTACATAGTACATAAAGCCATTTCACGTACATAGCACATTACAGTCAAATCCCTTCTCGTCCCCATGGTAGACCCCCCTCAG

.....T  
.....T  
.....T  
.....T  
.....T  
.....T  
.....T  
.....T

[illegible]

TGCTTACAAGCAAGTACAGCAATCAACCTCAACTATCACACATCAACTGCAACTCCAAAGCCACCCCTCACCCACTAGGATACCAACAAACCTACCCACCCCTTAACAGTACATAGTACATAAAGCCATTACCGTACATAGCACCATTACAGTCAAATCCCTTCTCGTCCCCATGGATGACCCCCCTCAG

[illegible]

TCGTTACAAGCAAGTACAGCAATCAACCCCTCAACTATCACACATCAACTGCAACTCCAAAGCCACCCCTCACCCACTAGGATACCAACAACCTATCCACCCTTTAAAGTACATAGTACATAAAGCCATTTACCGTACATAGCACATTACAGTCAAATCCCTTCTCGTCCCATGGATGACCCCTTCAG

C.

CRS TTCTTTCATGGGGAAGCAGATTGGGTACCACCAAGTATTGACTCACCACATCAACAACCGCTATGTATTTGTCATATTACTGCCAGCCACCATGAATATTGTACGGTACCATAAACTTACCACCTGTAGTACATAAAAAACCAATCCACATCAAAACCCCTCCCCA

|  |    |     |                                         |
|--|----|-----|-----------------------------------------|
|  | S6 | 1.1 | CGCTATGTATTTCGTACATTACTGC.....A.....T.. |
|  | S6 | 1.1 | .....A.....T..                          |
|  | S6 | 1.1 | .....A.....T..                          |
|  | S6 | 1.2 | .....A.....T..                          |
|  | S6 | 1.2 | .....A.....T..                          |
|  | S6 | 2.1 | .....A.....T..                          |

CRS TTCTTTCATGGGGAAGCAGATTGGGTACCACCAAGTATTGACTCACCCATCAACAACCGCTATGTATTTCGTACATTACTGCCAGCCACCATGAATATTGTACGGTACCATAAATACTTGACCACCTGTAGTACATAAAAAACCAATCCACATCAAAACCCCTCCCCA

|    |     |                                |
|----|-----|--------------------------------|
| S8 | 1.1 | CGCTATGTATTTCGTACATTACTGC..... |
| S8 | 1.1 | .....                          |
| S8 | 1.1 | .....                          |
| S8 | 1.1 | .....                          |
| S8 | 1.1 | .....T.....                    |
| S8 | 2.1 | .....                          |

```

S8      1.1
S8      1.1
S8      1.1
S8      1.2
S8      1.2
S8      2.1
S8      2.1
S8      2.1
S8      .....

```

TGCTTACAAGCAAGTACAGCAATCAACCTCTAACTATCACATCAACTCGCAACTCCAAAGCCACCCCTCACCCTAGTAGGATACCAACAAACCTACCCACCCTTAACAGTACATAGTACATAAAAGCCATTTACCGTACATAGCACATTACAGTCAAAATCCCTTCTCGTCCCCATGGTAGACCCCTCAG

TGCTTACAAGCAAGTACAGCAATCAACCCCTCAACTATCACACATCAACTGCAACTCCAAAGCCACCCCTCACCCACTAGGATACCAACAAACCTACCCACCCCTTAACAGTACATAGTACATAAAGCCATTACCGTACATAGCACATTACAGTCAAAATCCCTTCTCGTCCCCATGGTAGACCCCCCTCAG

[illegible]

CRS TTCTTTTCATGGGGAAGCAGATTTTGGGTACCAACCAAGTATTGACTCACCCATCAACAACCGCTATGTATTTCGTACATTACTGCCAGCCACCATGAATATTGTACGGTACCATAAATACTTGACCACCTGTAGTACATAAAAAACCAATCCACATCAAACCCCTCC

|    |     |                                   |
|----|-----|-----------------------------------|
| S9 | 1.1 | .....ACCATAAACTCTTGACCACCTGTAGTAC |
| S9 | 1.1 | .....                             |
| S9 | 1.1 | .....                             |
| S9 | 1.1 | .....                             |
| S9 | 1.2 | .....                             |
| S9 | 1.2 | .....                             |
| S9 | 2.1 | .....                             |
| S9 | 2.1 | .....                             |

| Sample | Read | Sequence                       |
|--------|------|--------------------------------|
| S9     | 1.1  | CGCTATGTATTTCGTACATTACTGC..... |
| S9     | 1.1  | .....                          |
| S9     | 1.1  | .....                          |
| S9     | 1.1  | .....G.....                    |
| S9     | 2.1  | .....                          |
| S9     | 2.1  | .....                          |
| S9     | 2.1  | .....                          |
| S9     | 2.2  | .....                          |
| S9     | 2.2  | .....                          |

[illegible][illegible]

CRS TTCTTTCATGGGGAAGCAGATTGGGTACCA<sup>CCCAAG</sup>TATTGACTCACC<sup>CAAT</sup>CAACA<sup>ACCG</sup>CTATGTATTTCGTACATTACTGCCAGCCACCATGAATATTGTACGGTACCATAAA<sup>TA</sup>CTTGACCACCTGTAGTACATAAAAA<sup>CCCA</sup>ATCCACATCAAAA<sup>CCCC</sup>CTCCCC

```

S10 1.1 .....ACCATAAATACTTGACCACCTGTAGTAC
S10 1.1 .....
S10 1.1 .....
S10 1.1 .....
S10 1.1 .....
S10 1.2 .....T.....
S10 1.2 .....
S10 2.1 .....
S10 2.1 .....

```

| Sample | Read | Sequence                       |
|--------|------|--------------------------------|
| S10    | 1.1  | CGCTATGTATTTCGTACATTACTGC..... |
| S10    | 1.1  | .....                          |
| S10    | 1.1  | .....                          |
| S10    | 1.1  | .....                          |
| S10    | 2.1  | .....                          |
| S10    | 2.1  | .....                          |
| S10    | 2.1  | .....                          |
| S10    | 2.2  | .....                          |
| S10    | 2.2  | .....                          |

ATGTTTACCAAGCAAGTACAGCAATCAACCCCTCAACTATCACATCAACTGCAACTCCAAGGCCACCCCTCACCCACTAGGATACCAACAAACCTACCCACCCCTTAACAGTACATAGTACATAAAGCCATTTCCTGTACATAGCACATTACAGTCAAAATCCCTTCTCGTCCCCATGGATGACCCCCCTCAG

[illegible]

.....

ATGCTTACAAGCAAGTACAGCAATCAACCCCTCAACTATCACACATCAAGCTGCAACTCCAAAGCCACCCCTCACCCACTAGGATACCAACAAACCTATCCCAACCTTAAACAGTACATAGTACATAAAGCCATTACCGTACATAGCACATTACAGTCAAATCCCTTTCGTCGCCATGGATGACCCCCCTCAG

[illegible]

.....



CATGCTTACAAGCAAGTACAGCAATCAACCCCTCAACTATCACACATCAACTGCAACTCCAAGGCCACCCCTCACCCACTAGGATACCAACAAACCTACCCACCCCTTAACAGTACATAGTACATAAAGCCATTTACCGTACATAGCACATTACAGTCAAATCCCTTCTCGTCCCCATGGATGACCCCCCTCAG

CAACTATCACACATCAACTGCAA.....T.....  
 .....T.....  
 .....T.....  
 .....T.....  
 .....T.....  
 .....T.....T.....  
 .....T.....  
 .....T.....  
 .....T.....

CATGCTTACAAGCAAGTACAGCAATCAACCCCTCAACTATCACACATCAACTGCAACTCCAAAGCCACCCCTCACCCACTAGGATACCAACAAACCTACCCACCCCTTAACAGTACATAGTACATAAAGCCATTTACCGTACATAGCACATTACAGTCAAAATCCCTTCTCGTCCCCATGGATGACCCCCCTCAG

CAACTATCACACATCAACTGCAA.....  
.....  
.....  
.....C.....  
.....  
.....  
.....  
.....
