# Supplementary material for: Origins and Evolution of the Etruscans’ mtDNA
Source: PubMed Central journal article supplement (PMC3566088; doi:10.1371/journal.pone.0055519), 2013-02-06

A

## Mapping Results

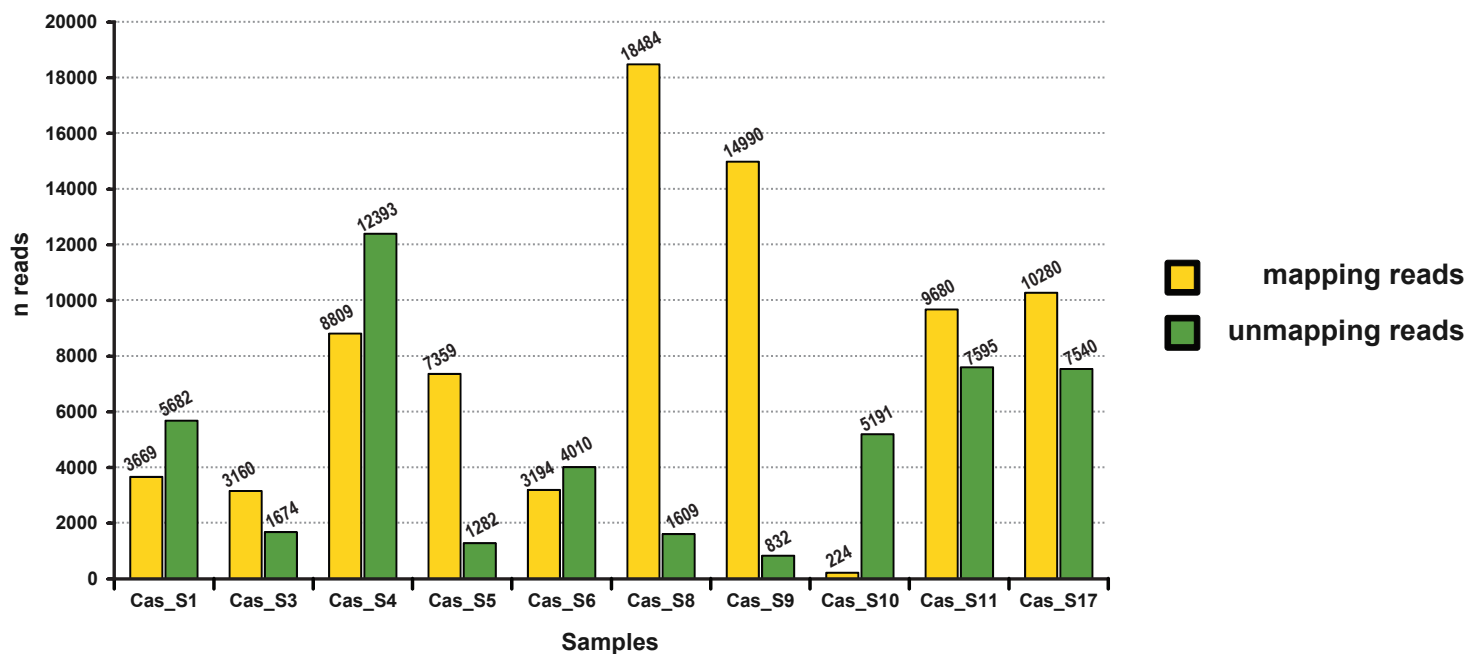

B

## Distribution of the most frequent nucleotide

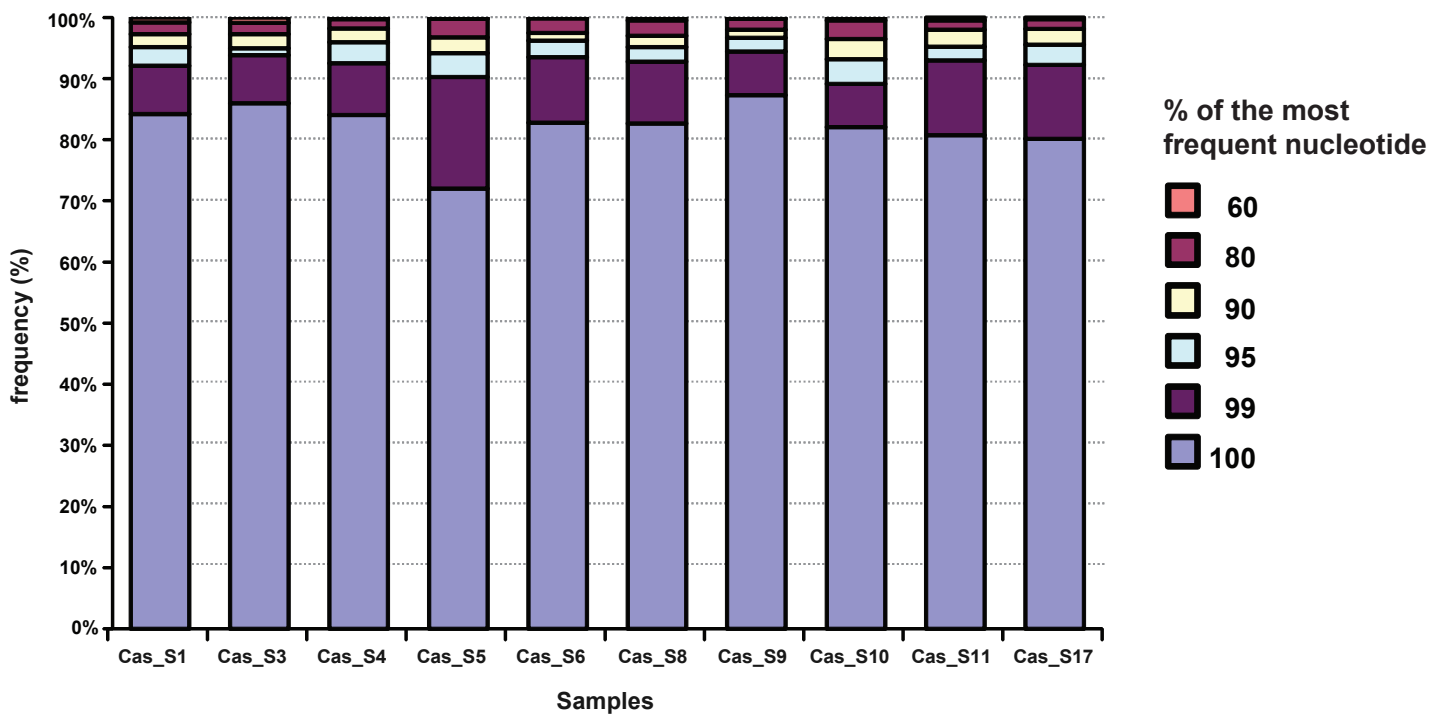

Supplement: pone.0055519.s002.pdf [file pone.0055519.s002.pdf]
