# Supplementary material for: Origins and Evolution of the Etruscans’ mtDNA
Source: PubMed Central journal article supplement (PMC3566088; doi:10.1371/journal.pone.0055519), 2013-02-06

A

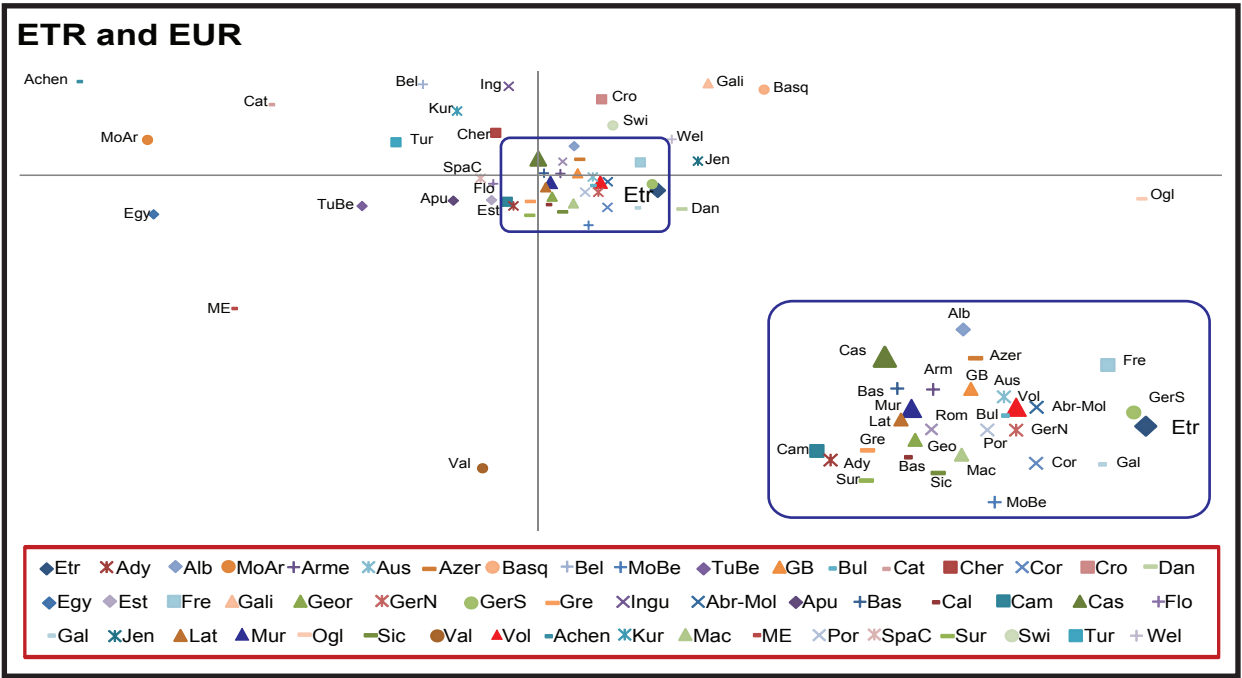

B

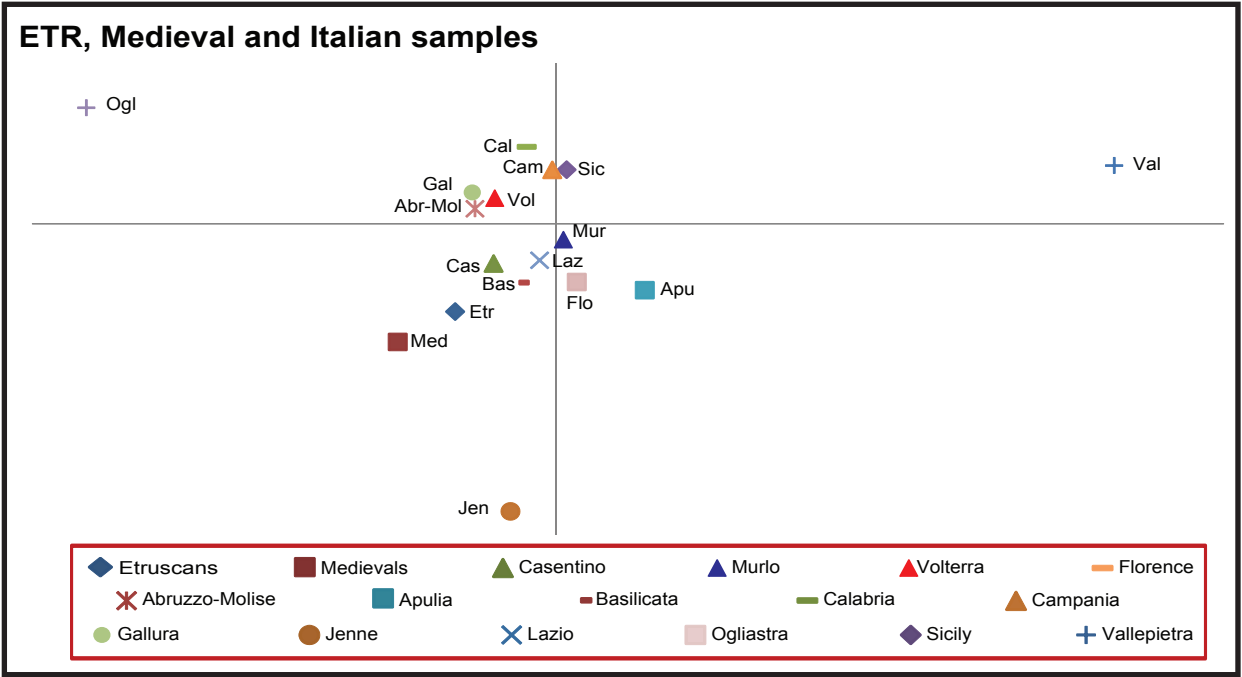

C

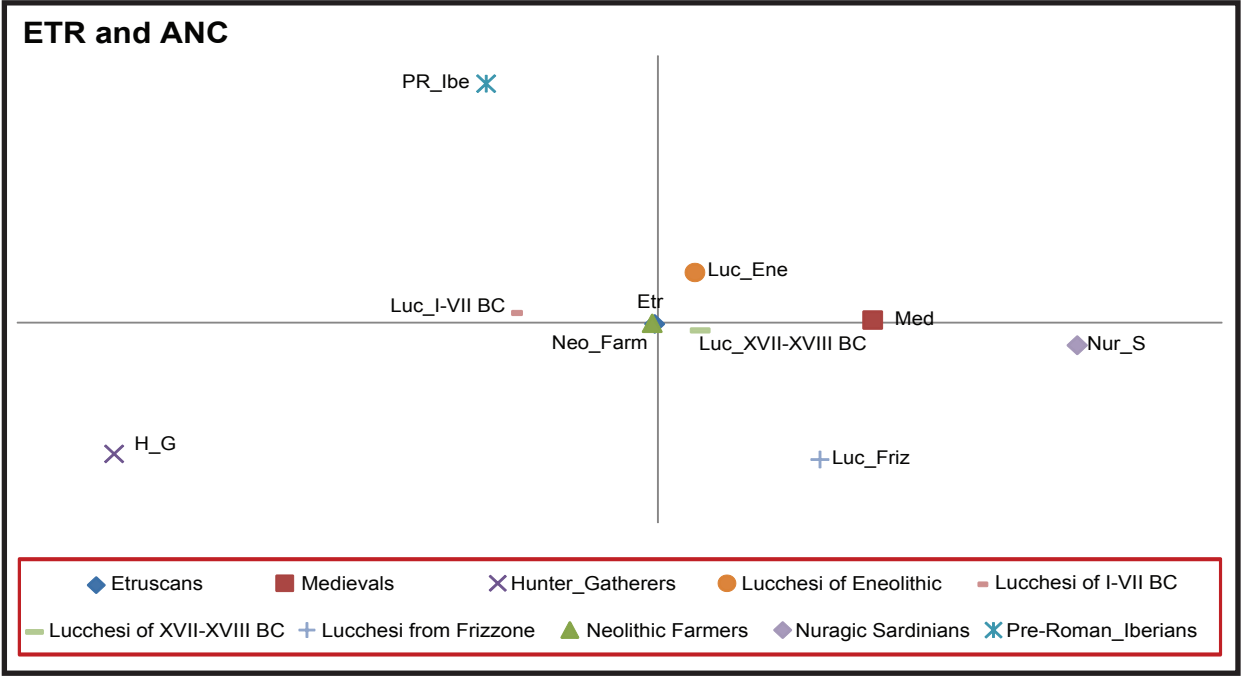

Supplement: pone.0055519.s004.pdf [file pone.0055519.s004.pdf]
