# Supplementary material for: Origins and Evolution of the Etruscans’ mtDNA
Source: PubMed Central journal article supplement (PMC3566088; doi:10.1371/journal.pone.0055519), 2013-02-06
Supplement: pone.0055519.s005.pdf [file pone.0055519.s005.pdf]

Years ago

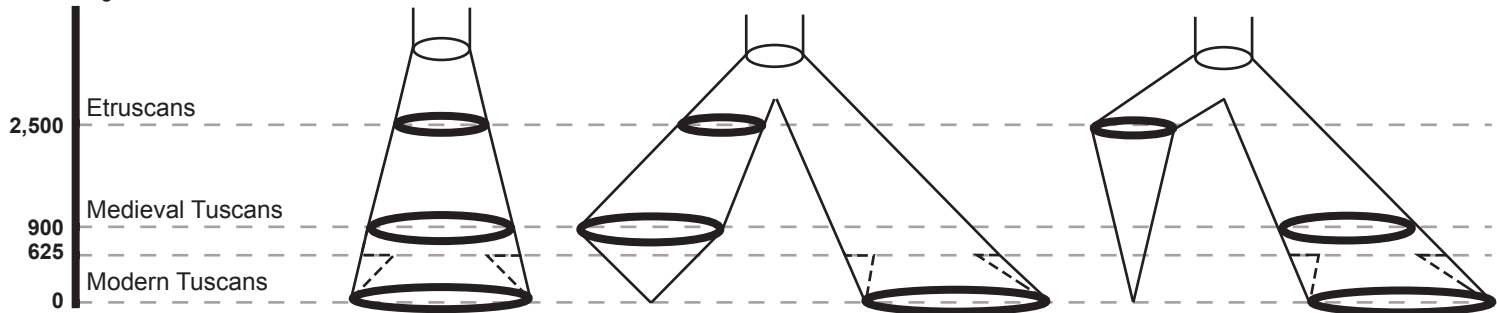

**MODEL 1**

**MODEL 2**

**MODEL 3**

**Probabilities**

|    |        | CASENTINO    |              |              |              |          |        |
|----|--------|--------------|--------------|--------------|--------------|----------|--------|
| N  |        | NoPlague     | Plague       | NoPlague     | Plague       | NoPlague | Plague |
| LR | 50,000 | <b>0.986</b> | <b>0.998</b> | 0.012        | 0.000        | 0.002    | 0.002  |
| AR | 100    | <b>0.949</b> | <b>0.990</b> | 0.040        | 0.000        | 0.010    | 0.000  |
|    |        | MURLO        |              |              |              |          |        |
| N  |        | NoPlague     | Plague       | NoPlague     | Plague       | NoPlague | Plague |
| LR | 50,000 | 0.012        | 0.350        | <b>0.988</b> | <b>0.647</b> | 0.000    | 0.004  |
| AR | 100    | 0.060        | 0.360        | <b>0.940</b> | <b>0.620</b> | 0.000    | 0.020  |
|    |        | VOLTERRA     |              |              |              |          |        |
| N  |        | NoPlague     | Plague       | NoPlague     | Plague       | NoPlague | Plague |
| LR | 50,000 | <b>0.757</b> | <b>0.958</b> | 0.227        | 0.024        | 0.016    | 0.017  |
| AR | 100    | <b>0.650</b> | <b>0.900</b> | 0.330        | 0.070        | 0.020    | 0.030  |
