# Supplementary material for: Origins and Evolution of the Etruscans’ mtDNA
Source: PubMed Central journal article supplement (PMC3566088; doi:10.1371/journal.pone.0055519), 2013-02-06

**A**

|                             | Priors            | Median  | Mode    | 95% HPD-LowB | 95% HPD-UppB | R <sup>2</sup> |
|-----------------------------|-------------------|---------|---------|--------------|--------------|----------------|
| <b>Time MRCA</b>            | *                 | 23,400  | 15,725  | 62,100       | 4,100        | 0.55           |
| <b>Ne Modern</b>            | (100 - 200,000)   | 152,645 | 200,000 | 200,000      | 66,833       | 0.40           |
| <b>Time Onset Expansion</b> | (2,550 - 37,500)  | 13,575  | 9,175   | 33,450       | 4,125        | 0.28           |
| <b>Mutation Rate</b>        | (0.0003 - 0.0075) | 0.0027  | 0.0022  | 0.0057       | 0.0009       | 0.64           |
| <b>Ne Ancestral</b>         | (5 - 6,000)       | 216     | 67      | 1,187        | 5            | 0.43           |

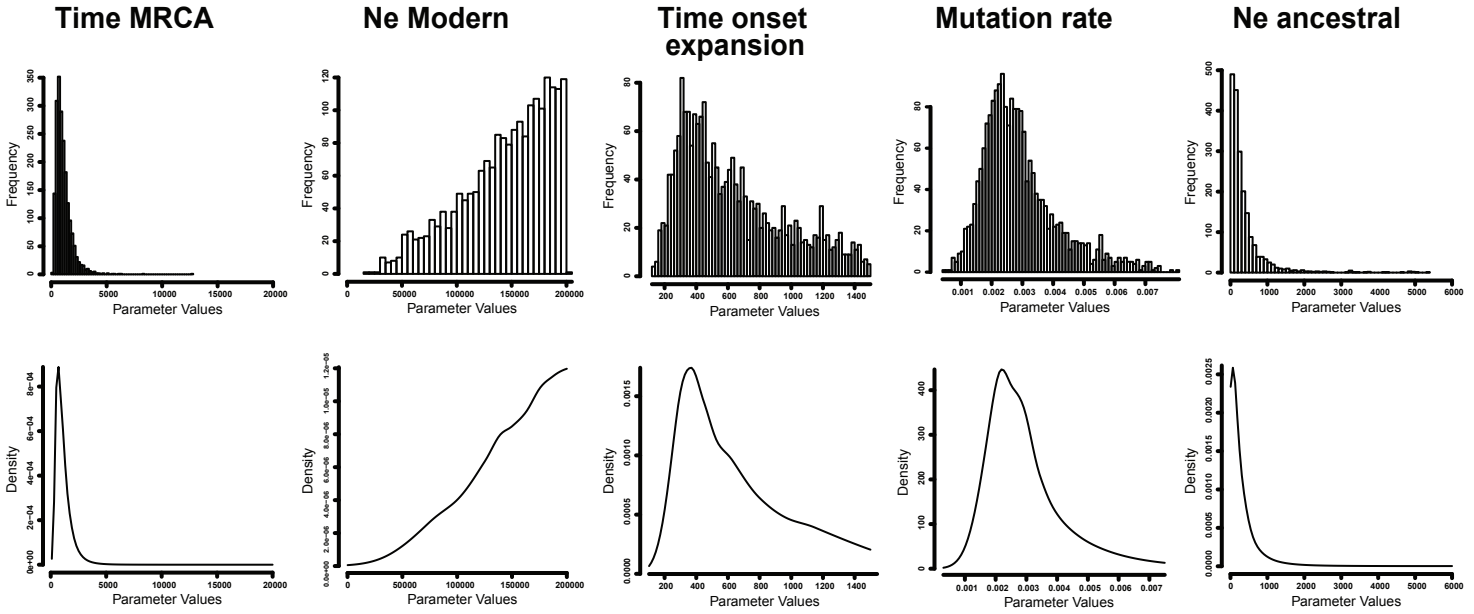

**B**

|                             | Priors            | Median  | Mode    | 95% HPD-LowB | 95% HPD-UppB | R <sup>2</sup> |
|-----------------------------|-------------------|---------|---------|--------------|--------------|----------------|
| <b>Time MRCA</b>            | *                 | 31,425  | 20,400  | 6,525        | 81,125       | 0.56           |
| <b>Ne Modern</b>            | (100 - 200,000)   | 119,430 | 200,000 | 35,406       | 200,000      | 0.38           |
| <b>Time Onset Expansion</b> | (2,550 - 37,500)  | 21,625  | 16,450  | 10,300       | 37,500       | 0.28           |
| <b>Mutation Rate</b>        | (0.0003 - 0.0075) | 0.0023  | 0.0023  | 0.0008       | 0.0048       | 0.64           |
| <b>Ne Ancestral</b>         | (5 - 6,000)       | 388     | 150     | 5            | 1,953        | 0.43           |

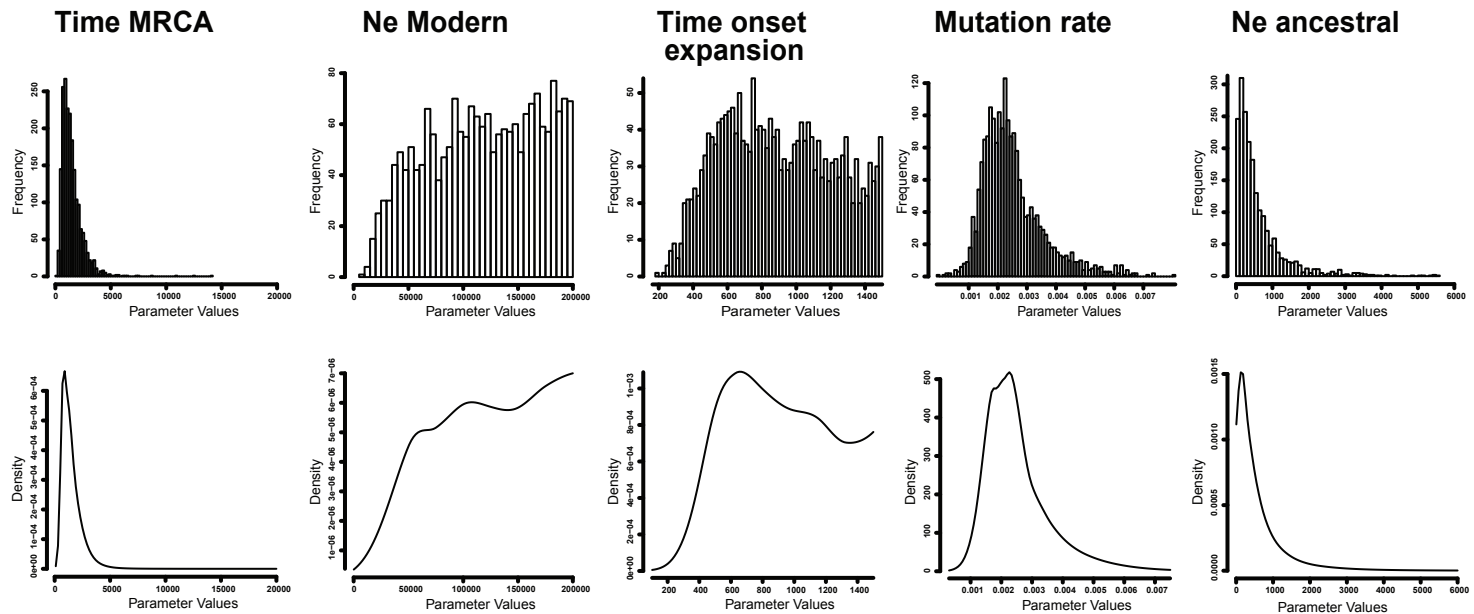

Supplement: pone.0055519.s006.pdf [file pone.0055519.s006.pdf]
