# Supplementary material for: Origins and Evolution of the Etruscans’ mtDNA
Source: PubMed Central journal article supplement (PMC3566088; doi:10.1371/journal.pone.0055519), 2013-02-06
Supplement: pone.0055519.s007.pdf [file pone.0055519.s007.pdf]

A

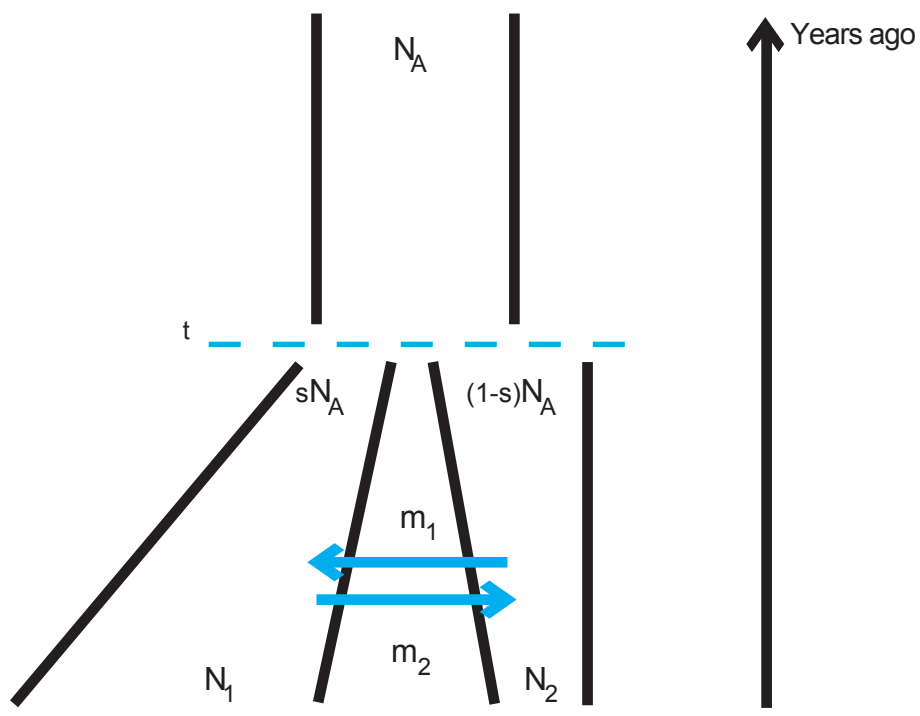

B

| Separation Time                                                                 | Run 1  | Run 2  | Run3   | Run 4  |
|---------------------------------------------------------------------------------|--------|--------|--------|--------|
| <b>Mutation Rate = 0.0014</b> <span style="float: right;"><b>s = 0.5</b></span> |        |        |        |        |
| Mean                                                                            | 16,180 | 16,939 | 16,861 | 15,739 |
| 95% LowB CI                                                                     | 12,500 | 12,461 | 12,020 | 11,780 |
| 95% UppB CI                                                                     | 20,620 | 22,020 | 22,700 | 21,580 |
| <b>Mutation Rate = 0.003</b> <span style="float: right;"><b>s = 0.5</b></span>  |        |        |        |        |
| Mean                                                                            | 7,775  | 7,980  | 7,663  | 6,692  |
| 95% LowB CI                                                                     | 5,572  | 5,945  | 5,665  | 6,002  |
| 95% UppB CI                                                                     | 9,958  | 10,556 | 10,444 | 9,861  |
| <b>Mutation Rate = 0.006</b> <span style="float: right;"><b>s = 0.5</b></span>  |        |        |        |        |
| Mean                                                                            | 3,775  | 3,915  | 3,748  | 3,831  |
| 95% LowB CI                                                                     | 2,683  | 2,954  | 2,749  | 2,935  |
| 95% UppB CI                                                                     | 4,989  | 5,017  | 4,839  | 4,905  |
| <b>Mutation Rate = 0.003</b> <span style="float: right;"><b>s = 0.95</b></span> |        |        |        |        |
| Mean                                                                            | 9,183  | 9,146  |        |        |
| 95% LowB CI                                                                     | 6,698  | 6,474  |        |        |
| 95% UppB CI                                                                     | 12,583 | 13,088 |        |        |
